# Supplementary material for: First Comprehensive Study of a Giant among the Insects, Titanus giganteus: Basic Facts from Its Biochemistry, Physiology, and Anatomy
Source: MDPI journal article supplement (doi:10.3390/insects11020120), 2020-02-12
Supplement: s1 [file s1]

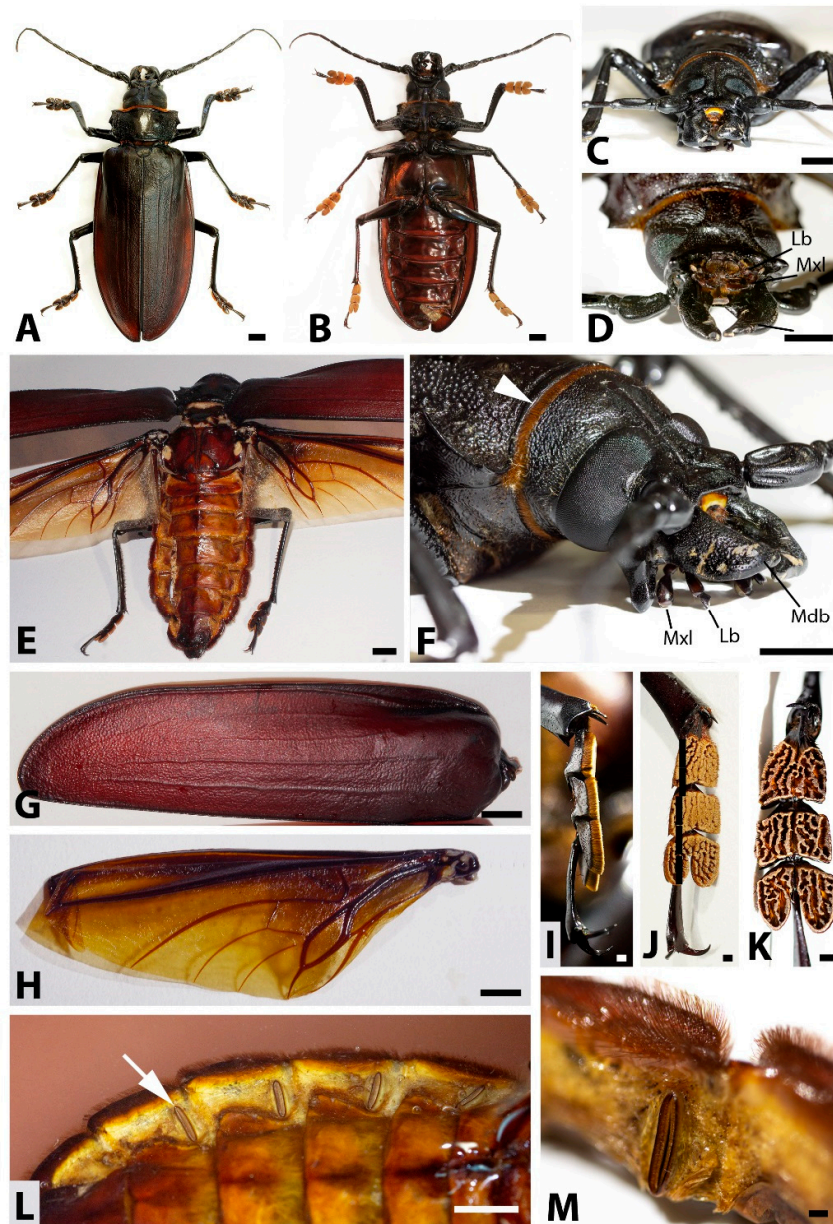

**Figure S1.** *T. giganteus* external morphology. (A,B)—Habitus, dorsal and ventral view. (C)—Anterior view. (D)—Head, anteroventral view. (E)—Posterodorsal view of body with wings open. (F)—Head, anterolateral view (arrow points to a row of setae lining anterior prothoracic margin). (G)—Left elytron, dorsal view. (H)—Folded left wing, dorsal view. (I,J)—Third right leg tarsus, lateral view, ventral view, respectively. (K)—First three tarsal segments of third right leg, ventral view on the moist adhesive setae (the moistening elicited structural artefacts). (L)—Left half of abdomen with spiracles (spiracle of sixth segment arrowed). (M)—A detailed view of sixth abdominal spiracle. Abbreviations: Mdb, mandible; Mxl, maxilla, maxillary palp; Lb, labium, labial palp. Scale bar: 1 cm (A–H,L); 1 mm (I–K,M).
